# Supplementary material
Source: publisher figshare collection journal article supplement (https://gsapubs.figshare.com/ndownloader/files/23295767)
Supplement: Supplementary file 1 [file 23295767]

Figure DR1. A) Regional Late Ordovician paleogeography (from R. Blakey website, (<http://www2.nau.edu/rcb7/>)). Red boxes show location of studied sections. B) Map of Kentucky showing location of studied sections along Highways 427, 127, 68. Open circle is city of Frankfort. Section locations indicated by squares; abbreviations outlined in Figure 3. C) Schematic stratigraphic columns of Lexington Limestone at locations near Frankfort, Kentucky. Intervals outlined by numbers 1-6 indicate parasequence sets defined and correlated by Pope and Read (1997; 1998a,b). Gray shading indicates position of studied cycles within parasequence sets. D) Map of Anticosti Island, Quebec, Canada showing location (black squares) of studied sections CV and PE. E) Schematic stratigraphic column of Vaureal Formation and overlying formations showing approximate position of studied cycles (gray shading). Modified from Long, 2007.

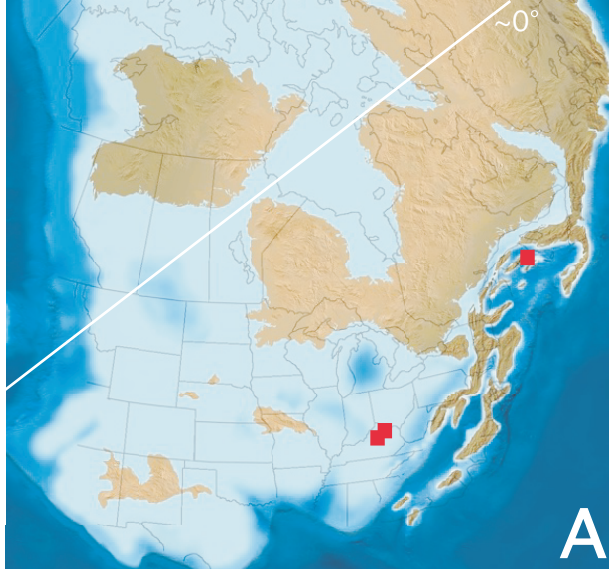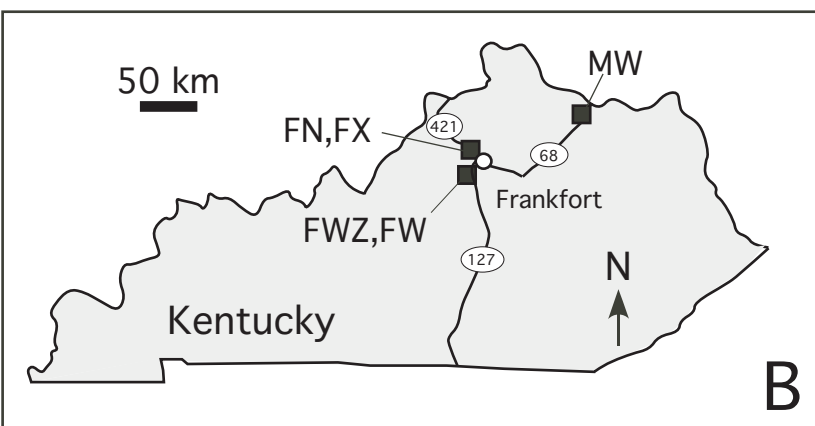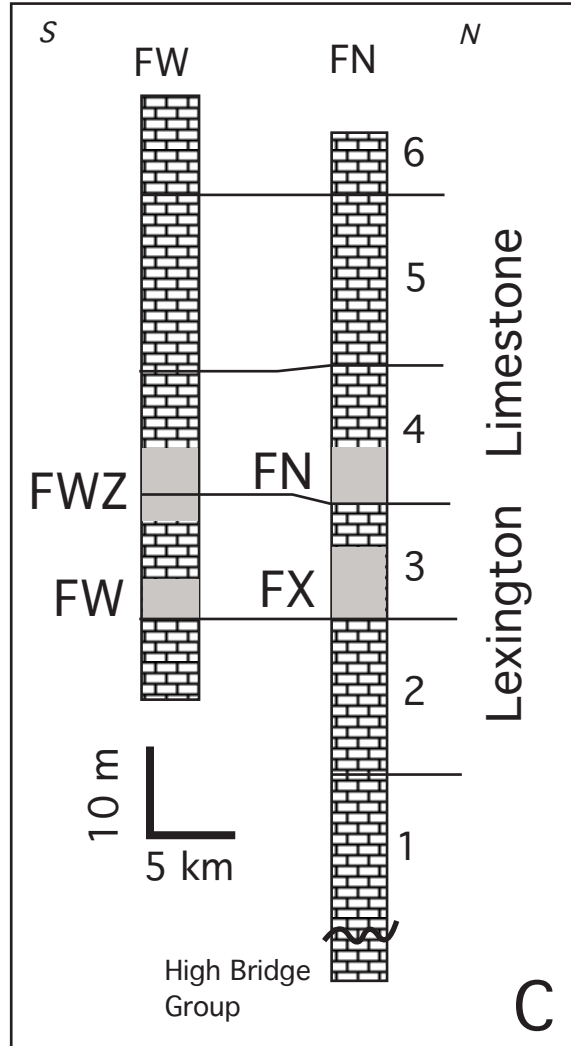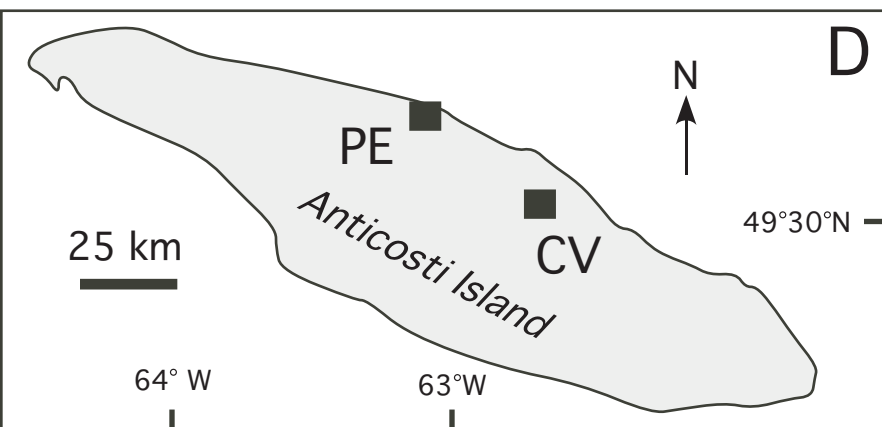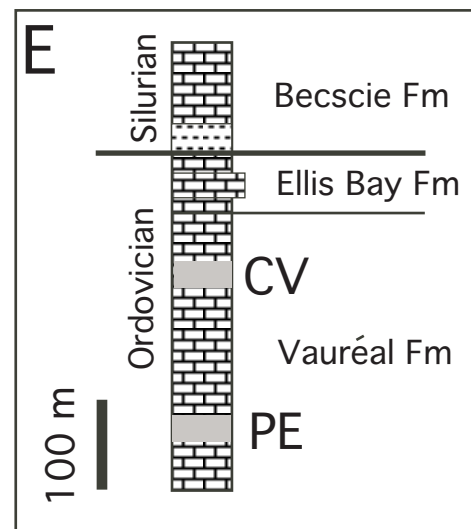

Figure DR-1

Table DR1.

| Sample number      | Formation (mbr.) | Location              | Conodont taxa             | $\delta^{18}O$ ‰ SMOW | Ag <sub>3</sub> PO <sub>4</sub> (μg)** |
|--------------------|------------------|-----------------------|---------------------------|-----------------------|----------------------------------------|
| FW 0.2             | Lexington        | HW 127, KY, east side | ramiform undifferentiated | 19.1                  | 430,450,450                            |
| FW 0.8             | Lexington        | HW 127, KY            | ramiform undifferentiated | 19.2                  | 460,465,500                            |
| FW 1.8             | Lexington        | HW 127, KY            | ramiform undifferentiated | 19.1                  | 480,425                                |
| FW 2.3             | Lexington        | HW 127, KY            | ramiform undifferentiated | 18.5                  | 495,490,425                            |
| FW 2.8             | Lexington        | HW 127, KY            | ramiform undifferentiated | 18.4                  | 450,420                                |
| FW 3.5             | Lexington        | HW 127, KY            | ramiform undifferentiated | 19.3                  | 475,515                                |
| FW 3.9             | Lexington        | HW 127, KY            | ramiform undifferentiated | 19.1                  | 475,485,450                            |
| FWZ ~10 m above FW |                  |                       |                           |                       |                                        |
| FWZ 0.6            | Lexington        | HW 127, KY, west side | ramiform undifferentiated | 18.36                 | 480,500                                |
| FWZ 1.1            | Lexington        | HW 127, KY            | ramiform undifferentiated | 17.9                  | 450,520                                |
| FWZ 1.4            | Lexington        | HW 127, KY            | ramiform undifferentiated | 17.84                 | 490,490,500                            |
| FWZ 1.8            | Lexington        | HW 127, KY            | ramiform undifferentiated | 17.55                 | 475,500,480                            |
| FWZ 2.4            | Lexington        | HW 127, KY            | ramiform undifferentiated | 19.44                 | 485,480                                |
| FWZ 3              | Lexington        | HW 127, KY            | ramiform undifferentiated | 18.54                 | 480,510,505                            |
| FWZ 4.5            | Lexington        | HW 127, KY            | ramiform undifferentiated | 17.1                  | 490,515,490                            |
| FWZ 5.4            | Lexington        | HW 127, KY            | ramiform undifferentiated | 17.94                 | 505,510,500                            |
| FWZ 7.9            | Lexington        | HW 127, KY            | ramiform undifferentiated | 18.07                 | 500,510,490,510                        |
| FWZ 8.5            | Lexington        | HW 127, KY            | ramiform undifferentiated | 19.4                  | 470,480,490                            |
| FWZ 9.1            | Lexington        | HW 127, KY            | ramiform undifferentiated | 17.48                 | 510,510,505                            |
| FN 0.2             | Lexington        | HW 421, KY, west side | ramiform undifferentiated | 18.8                  | 480,480,490                            |
| FN 0.5             | Lexington        | HW 421, KY            | ramiform undifferentiated | 19.6                  | 495,490,480                            |
| FN 0.7             | Lexington        | HW 421, KY            | ramiform undifferentiated | 19.1                  | 460,460                                |
| FN 1.0 r           | Lexington        | HW 421, KY            | ramiform undifferentiated | 18.8                  | 500,510,480                            |
| FN 1.0 c           | Lexington        | HW 421, KY            | coniform undifferentiated | 18.6                  | 460                                    |
| FN 1.3             | Lexington        | HW 421, KY            | ramiform undifferentiated | 19.3                  | 475,450,480                            |
| FN 1.7             | Lexington        | HW 421, KY            | ramiform undifferentiated | 18.9                  | 450,500,480                            |
| FN 2.1             | Lexington        | HW 421, KY            | ramiform undifferentiated | 19.6                  | 470,450,460                            |
| FN 2.4             | Lexington        | HW 421, KY            | ramiform undifferentiated | 19.6                  | 520,480,500                            |
| FN 3.2             | Lexington        | HW 421, KY            | ramiform undifferentiated | 19.3                  | 440,450                                |
| FX ~15 m below FN  |                  |                       |                           |                       |                                        |
| FX 0.8             | Lexington        | HW 421, KY, east side | ramiform undifferentiated | 19.08                 | 505,500,505                            |
| FX 1.2             | Lexington        | HW 421, KY            | ramiform undifferentiated | 17.47                 | 515,510,515                            |
| FX 1.8             | Lexington        | HW 421, KY            | ramiform undifferentiated | 18.79                 | 490,495,490                            |
| FX 2.9             | Lexington        | HW 421, KY            | ramiform undifferentiated | 18.85                 | 490,480                                |
| FX 3.4             | Lexington        | HW 421, KY            | ramiform undifferentiated | 16.98                 | 490,510,510                            |
| FX 4.2             | Lexington        | HW 421, KY            | ramiform undifferentiated | 19.12                 | 500,515                                |
| FX 4.9             | Lexington        | HW 421, KY            | ramiform undifferentiated | 19.31                 | 500,500,520                            |
| FX 5.3             | Lexington        | HW 421, KY            | ramiform undifferentiated | 19.32                 | 500,480                                |

Table DR1.

|                                                                 |      |           |                           |       |                 |
|-----------------------------------------------------------------|------|-----------|---------------------------|-------|-----------------|
| MW US 68, KY, ~1.2 km west of Ohio River, north side of highway |      |           |                           |       |                 |
| MW 0.5                                                          | Kope |           | ramiform undifferentiated | 19.01 | 490,475         |
| MW 1.2                                                          | Kope | US 68, KY | ramiform undifferentiated | 18.29 | 490,490,500     |
| MW 2.2 r                                                        | Kope | US 68, KY | ramiform undifferentiated | 18.71 | 480,480,490     |
| MW 2.2 c                                                        | Kope | US 68, KY | coniform undifferentiated | 19.05 | 490,495,475     |
| MW 3.2                                                          | Kope | US 68, KY | ramiform undifferentiated | 18.67 | 480,480         |
| MW 4.9                                                          | Kope | US 68, KY | ramiform undifferentiated | 18.79 | 475,510,510,510 |
| MW 6                                                            | Kope | US 68, KY | ramiform undifferentiated | 19.26 | 500,480,480     |
| MW 6.5                                                          | Kope | US 68, KY | ramiform undifferentiated | 19.18 | 505,480,500     |

|                                                                                                                         |                  |                     |                           |       |                 |
|-------------------------------------------------------------------------------------------------------------------------|------------------|---------------------|---------------------------|-------|-----------------|
| PE ~250 m below the Katian-Hirnantian boundary, ~7 km east of Pointe Carleton lighthouse, UTM: 20 U 522436 E; 5490879 N |                  |                     |                           |       |                 |
| PE 4.5 r                                                                                                                | upper Vaureal Fm | Pointe à l'Épinette | ramiform undifferentiated | 19.2  | 450,500         |
| PE 4.5 c                                                                                                                | upper Vaureal Fm | Pointe à l'Épinette | coniform undifferentiated | 18.8  | 450,475         |
| PE 5.0 c                                                                                                                | upper Vaureal Fm | Pointe à l'Épinette | coniform undifferentiated | 18.8  | 480,485,490,510 |
| PE 8.0                                                                                                                  | upper Vaureal Fm | Pointe à l'Épinette | ramiform undifferentiated | 17.44 | 480,490         |
| PE 11.5 m                                                                                                               | upper Vaureal Fm | Pointe à l'Épinette | ramiform & coniform mix   | 19.62 | 385             |

|                                                                                                                    |                  |                 |                           |       |                 |
|--------------------------------------------------------------------------------------------------------------------|------------------|-----------------|---------------------------|-------|-----------------|
| CV ~75 m below the Katian-Hirnantian boundary, ~1km downstream from main water fall, UTM: 20 U 499105 E; 5511008 N |                  |                 |                           |       |                 |
| CV -0.6                                                                                                            | upper Vaureal Fm | (Canyon Vaureal | ramiform undifferentiated | 17.87 | 485,450         |
| CV 0.2                                                                                                             | upper Vaureal Fm | (Canyon Vaureal | ramiform undifferentiated | 18.46 | 525,530         |
| CV 0.5                                                                                                             | upper Vaureal Fm | (Canyon Vaureal | ramiform undifferentiated | 18.89 | 500,480         |
| CV 1.0                                                                                                             | upper Vaureal Fm | (Canyon Vaureal | ramiform undifferentiated | 20.54 | 500,495         |
| CV 3.0                                                                                                             | upper Vaureal Fm | (Canyon Vaureal | ramiform undifferentiated | 18.32 | 495,510,475     |
| CV 3.5                                                                                                             | upper Vaureal Fm | (Canyon Vaureal | ramiform undifferentiated | 19.45 | 500,500,510     |
| CV 4.5                                                                                                             | upper Vaureal Fm | (Canyon Vaureal | ramiform undifferentiated | 18.71 | 505,490         |
| CV 5.3                                                                                                             | upper Vaureal Fm | (Canyon Vaureal | coniform undifferentiated | 20.19 | 500,525,530     |
| CV 6.3                                                                                                             | upper Vaureal Fm | (Canyon Vaureal | ramiform undifferentiated | 19.97 | 500,500,500     |
| CV 7.5                                                                                                             | upper Vaureal Fm | (Canyon Vaureal | ramiform undifferentiated | 20.32 | 405,430         |
| CV 8.6                                                                                                             | upper Vaureal Fm | (Canyon Vaureal | ramiform undifferentiated | 19.23 | 520,515,460,475 |
| CV 10                                                                                                              | upper Vaureal Fm | (Canyon Vaureal | ramiform undifferentiated | 19.63 | 480,490,520     |
| CV 12.8                                                                                                            | upper Vaureal Fm | (Canyon Vaureal | ramiform undifferentiated | 20.32 | 530,500         |

r = ramiform

c = coniform

m = mix ramiform-coniform elements

\*\* data plotted as average of multiple samples
